# Supplementary material for: Exogenous Application of Methyl Jasmonate and Salicylic Acid Mitigates Drought-Induced Oxidative Damages in French Bean (Phaseolus vulgaris L.)
Source: MDPI journal article supplement (doi:10.3390/plants10102066), 2021-09-30
Supplement: s1 [file s1]

**Table S1.** Daily weather data at the experimental site during the study period

| Date        | Air Temperature (°C) |      |      | Humidity (%) | Rainfall (mm) | Actual Evaporation (mm) |
|-------------|----------------------|------|------|--------------|---------------|-------------------------|
|             | Max.                 | Min. | Ave. |              |               |                         |
| 5 Dec 2020  | 28.0                 | 14.5 | 21.3 | 82           | 0             | 1.5                     |
| 6 Dec 2020  | 27.0                 | 15.0 | 21.0 | 91           | 0             | 1.33                    |
| 7 Dec 2020  | 27.5                 | 16.0 | 21.8 | 90           | 0             | 0.97                    |
| 8 Dec 2020  | 27.0                 | 17.0 | 22.0 | 90           | 0             | 0.88                    |
| 9 Dec 2020  | 25.5                 | 18.0 | 21.8 | 90           | 0             | 0.93                    |
| 10 Dec 2020 | 20.0                 | 15.0 | 17.5 | 90           | 0             | 0.44                    |
| 11 Dec 2020 | 22.0                 | 18.0 | 20.0 | 90           | 0             | 0.53                    |
| 12 Dec 2020 | 20.0                 | 14.5 | 17.3 | 90           | 0             | 0.44                    |
| 13 Dec 2020 | 23.0                 | 14.5 | 18.8 | 90           | 0             | 0.71                    |
| 14 Dec 2020 | 25.0                 | 14.0 | 19.5 | 91           | 0             | 0.84                    |
| 15 Dec 2020 | 26.5                 | 15.0 | 20.8 | 89           | 0             | 1.15                    |
| 16 Dec 2020 | 21.5                 | 15.0 | 18.3 | 90           | 0             | 0.53                    |
| 17 Dec 2020 | 26.5                 | 14.0 | 20.3 | 81           | 0             | 1.06                    |
| 18 Dec 2020 | 26.0                 | 12.0 | 19.0 | 81           | 0             | 1.11                    |
| 19 Dec 2020 | 24.0                 | 8.0  | 16.0 | 82           | 0             | 0.97                    |
| 20 Dec 2020 | 24.0                 | 11.0 | 17.5 | 79           | 0             | 1.15                    |
| 21 Dec 2020 | 24.5                 | 10.5 | 17.5 | 89           | 0             | 1.2                     |
| 22 Dec 2020 | 25.0                 | 10.0 | 17.5 | 90           | 0             | 1.33                    |
| 23 Dec 2020 | 26.0                 | 11.0 | 18.5 | 90           | 0             | 1.42                    |
| 24 Dec 2020 | 26.5                 | 11.5 | 19.0 | 90           | 0             | 1.46                    |
| 25 Dec 2020 | 26.0                 | 11.0 | 18.5 | 90           | 0             | 1.02                    |
| 26 Dec 2020 | 27.0                 | 12.0 | 19.5 | 80           | 0             | 1.24                    |
| 27 Dec 2020 | 26.0                 | 14.5 | 20.3 | 80           | 0             | 1.06                    |
| 28 Dec 2020 | 25.0                 | 11.0 | 18.0 | 80           | 0             | 0.97                    |
| 29 Dec 2020 | 25.5                 | 10.5 | 18.0 | 80           | 0             | 0.88                    |
| 30 Dec 2020 | 26.0                 | 12.0 | 19.0 | 90           | 0             | 1.06                    |
| 31 Dec 2020 | 27.0                 | 11.5 | 19.3 | 90           | 0             | 1.15                    |
| 1 Jan 2021  | 27.0                 | 11.0 | 19.0 | 90           | 0             | 1.11                    |
| 2 Jan 2021  | 27.5                 | 11.5 | 19.5 | 90           | 0             | 1.15                    |
| 3 Jan 2021  | 27.0                 | 11.0 | 19.0 | 81           | 0             | 1.24                    |
| 4 Jan 2021  | 28.0                 | 12.0 | 20.0 | 90           | 0             | 1.28                    |
| 5 Jan 2021  | 27.5                 | 12.0 | 19.8 | 81           | 0             | 1.33                    |

| Date        | Air Temperature (°C) |      |      | Humidity (%) | Rainfall (mm) | Actual Evaporation (mm) |
|-------------|----------------------|------|------|--------------|---------------|-------------------------|
|             | Max.                 | Min. | Ave. |              |               |                         |
| 6 Jan 2021  | 28.0                 | 13.5 | 20.8 | 81           | 0             | 1.5                     |
| 7 Jan 2021  | 30.0                 | 15.0 | 22.5 | 91           | 0             | 1.68                    |
| 8 Jan 2021  | 30.0                 | 14.5 | 22.3 | 81           | 0             | 1.77                    |
| 9 Jan 2021  | 29.5                 | 14.0 | 21.8 | 90           | 0             | 1.42                    |
| 10 Jan 2021 | 27.5                 | 15.0 | 21.3 | 81           | 0             | 1.28                    |
| 11 Jan 2021 | 27.0                 | 15.0 | 21.0 | 91           | 0             | 0.97                    |
| 12 Jan 2021 | 28.0                 | 15.0 | 21.5 | 90           | 0             | 1.06                    |
| 13 Jan 2021 | 26.0                 | 11.0 | 18.5 | 80           | 0             | 0.93                    |
| 14 Jan 2021 | 23.0                 | 13.0 | 18.0 | 90           | 0             | 0.88                    |
| 15 Jan 2021 | 24.0                 | 10.0 | 17.0 | 89           | 0             | 1.06                    |
| 16 Jan 2021 | 24.0                 | 11.0 | 17.5 | 90           | 0             | 1.15                    |
| 17 Jan 2021 | 23.5                 | 10.0 | 16.8 | 88           | 0             | 1.06                    |
| 18 Jan 2021 | 23.0                 | 11.0 | 17.0 | 88           | 0             | 0.88                    |
| 19 Jan 2021 | 23.5                 | 10.0 | 16.8 | 89           | 0             | 0.97                    |
| 20 Jan 2021 | 24.0                 | 13.5 | 18.8 | 90           | 0             | 1.11                    |
| 21 Jan 2021 | 22.0                 | 14.0 | 18.0 | 90           | 0             | 1.68                    |
| 22 Jan 2021 | 24.0                 | 13.0 | 18.5 | 89           | 0             | 0.97                    |

Source: Weather Station, Department of Agricultural Engineering, Bangabandhu Sheikh Mujibur Rahman Agricultural University, Gazipur, Bangladesh.

**Table S2.** Extracted Eigenvalues and latent vectors of studied traits associated with the first two principal components.

| Variable                      | Principal components |        |
|-------------------------------|----------------------|--------|
|                               | PC1                  | PC2    |
| Extracted Eigenvalues         | 21.736               | 6.379  |
| Explained variance (%)        | 75.0                 | 22.0   |
| Cumulative variance (%)       | 75.0                 | 97.0   |
| <i>Latent vectors</i>         |                      |        |
| RL                            | 0.689                | 0.657  |
| SL                            | 0.926                | -0.342 |
| RDW                           | 0.941                | -0.313 |
| SDW                           | 0.957                | -0.264 |
| LDW                           | 0.944                | -0.325 |
| TDW                           | 0.950                | -0.299 |
| CMS                           | 0.877                | 0.183  |
| LRWC                          | 0.997                | -0.070 |
| CTD                           | 0.997                | 0.016  |
| SPAD                          | 0.971                | 0.237  |
| Chl a                         | 0.999                | 0.025  |
| Chl b                         | 0.991                | -0.029 |
| T Chl                         | 0.998                | 0.021  |
| Carotenoid                    | 0.996                | 0.045  |
| Proline                       | -0.977               | 0.197  |
| H <sub>2</sub> O <sub>2</sub> | -0.988               | 0.077  |
| MDA                           | -0.967               | 0.234  |
| O <sub>2</sub> <sup>•-</sup>  | -0.984               | -0.117 |
| LOX                           | -0.962               | -0.203 |
| SOD                           | -0.191               | 0.979  |
| CAT                           | 0.884                | 0.353  |
| POD                           | 0.855                | 0.468  |
| APX                           | -0.163               | 0.971  |
| GPX                           | -0.272               | 0.961  |
| GR                            | -0.127               | 0.990  |
| GST                           | 0.105                | 0.959  |
| DHAR                          | 0.982                | 0.082  |
| MDHAR                         | 0.962                | 0.228  |

APX- ascorbate peroxidase, CAT- catalase, Chl a- chlorophyll a, Chl b- chlorophyll b, CMS- cell membrane stability, CTD- canopy temperature depression, DHAR- dehydroascorbate reductase, GPX- glutathione peroxidase, GR- glutathione reductase, GST- glutathione-S-transferase, H<sub>2</sub>O<sub>2</sub>- hydrogen peroxide, LDW- leaf dry weight, LOX- lipoxygenase, LRWC-leaf relative water content, MDA- malondialdehyde, MDHAR- monodehydroascorbate reductase, O<sub>2</sub><sup>•-</sup>- superoxide radical, POD- guaiacol

peroxidases, RDW- root dry weight, RL- root length, SDW- shoot dry weight, SL- shoot length, SOD-superoxide dismutase, SPAD- chlorophyll index, TDW- total dry weight, and T Chl- total chlorophyll.

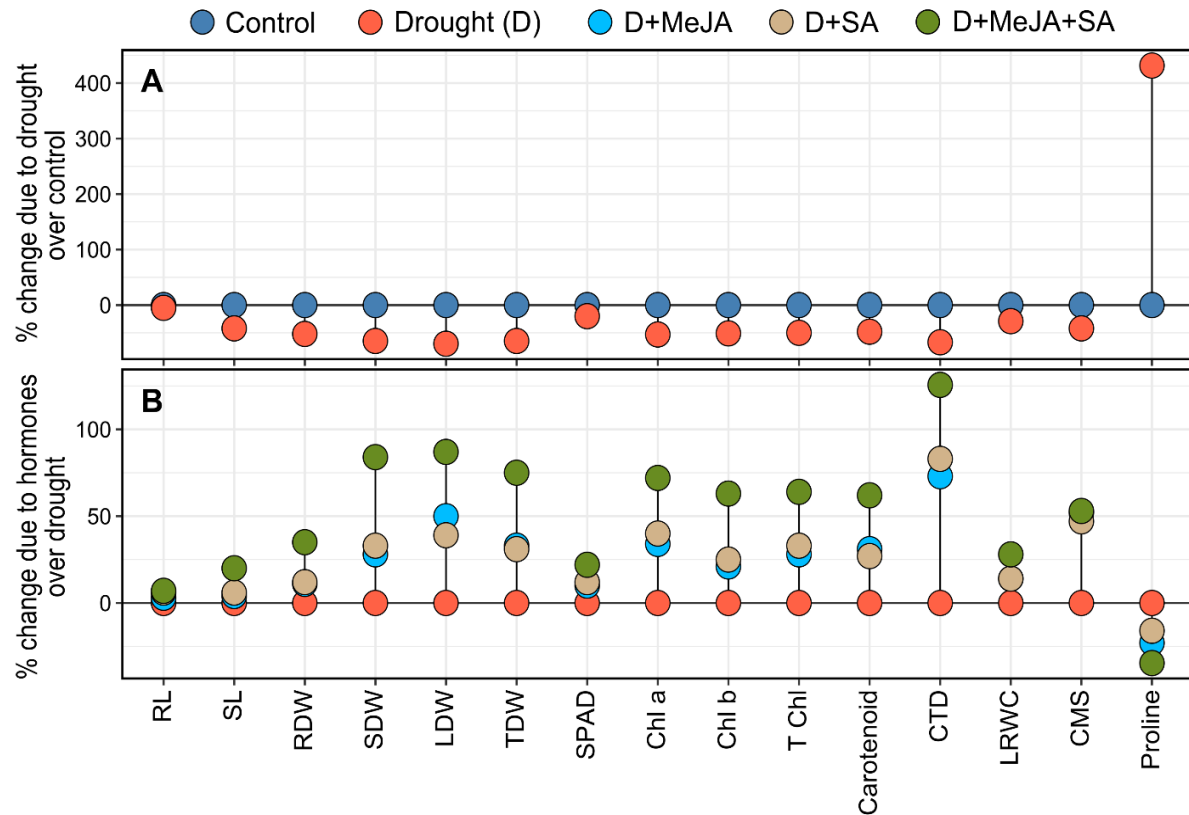

**Figure S1.** Variations in the studied growth and physiological parameters of French bean plants. A. Percent change due to drought over control and B. percent change over drought due to the application of methyl jasmonate (D+MeJA), salicylic acid (D+SA) and their combination (D+MeJA+SA) on drought-stressed plants. Control– plants grown under non-stress well-irrigated conditions, Drought– plants grown with a steady decline in moisture availability, D+MeJA– drought + seed and foliar pre-treatment with 20  $\mu$ M methyl jasmonate, D+SA– drought + seed and foliar pre-treatment with 2 mM salicylic acid, and D+MeJA+SA– drought + seed and foliar pre-treatment with combination of 10  $\mu$ M methyl jasmonate and 1 mM salicylic acid.

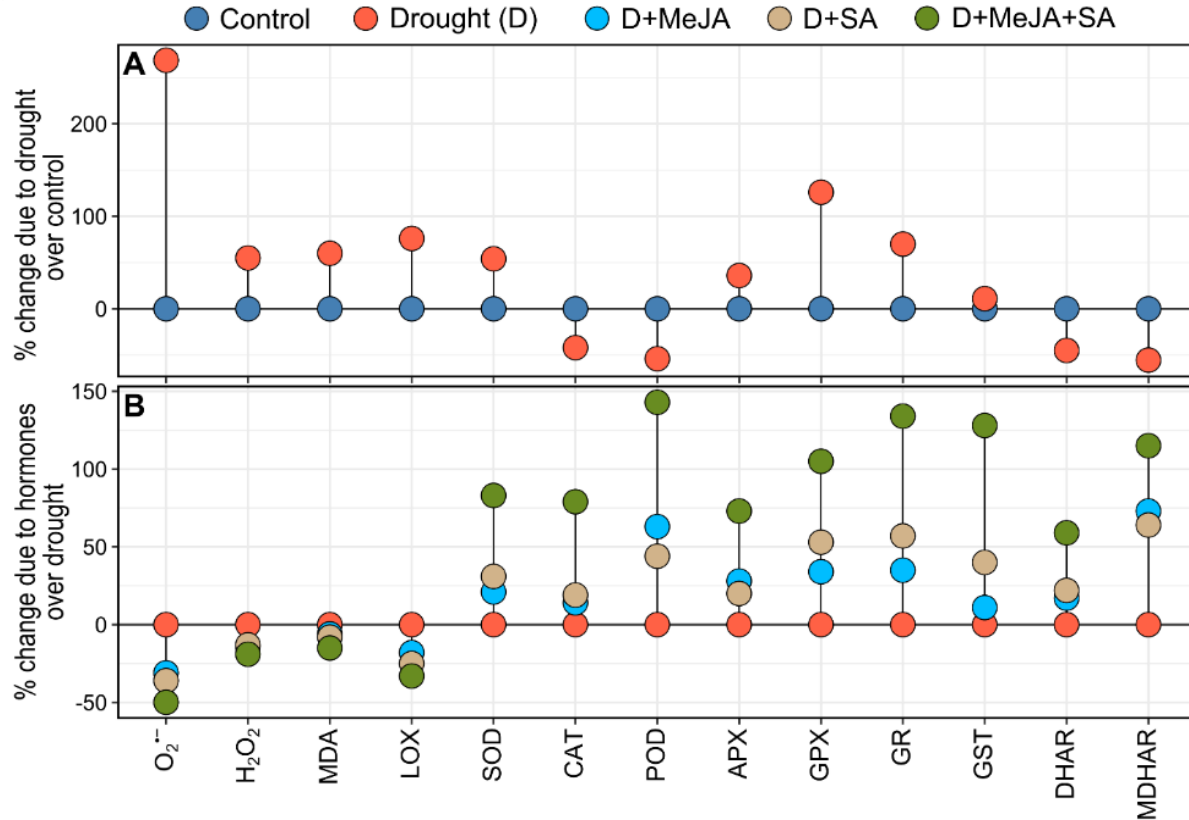

**Figure S2.** Variations in the oxidative stress indicators and antioxidant enzymes activity of French bean plants. A. Percent change due to drought over control and B. percent change over drought due to the application of methyl jasmonate (D+MeJA), salicylic acid (D+SA) and their combination (D+MeJA+SA) on drought stressed plants. Control– plants grown under non-stress well-irrigated conditions, Drought– plants grown with a steady decline in moisture availability, D+MeJA– drought + seed and foliar pre-treatment with 20  $\mu$ M methyl jasmonate, D+SA– drought + seed and foliar pre-treatment with 2 mM salicylic acid, and D+MeJA+SA– drought + seed and foliar pre-treatment with combination of 10  $\mu$ M methyl jasmonate and 1 mM salicylic acid.
